# Supplementary material for: Signal Transduction Pathways in the Pentameric Ligand-Gated Ion Channels
Source: PubMed Central journal article supplement (PMC3648548; doi:10.1371/journal.pone.0064326), 2013-05-08
Supplement: pone.0064326.s001.pdf [file pone.0064326.s001.pdf]

**Table S1:** Highest probability paths for each residue in the NQN mutation site (D91, E177, D178) and ketamine binding site (N152, D153, D154, F174, L176, K183)

|                        | <b>β1-β2 Loop</b>                                                                                          | <b>Pre-TM1</b>                                                                                              |
|------------------------|------------------------------------------------------------------------------------------------------------|-------------------------------------------------------------------------------------------------------------|
| Subunit B to subunit B |                                                                                                            |                                                                                                             |
| D91                    | V90, V89, D88, A87, D86, S107, A108, R109, <b>T36, A34, K33</b> , T244, E243, N239, I236, I233             | N/A                                                                                                         |
| D178                   | E177, L176, <b>Y23, N152, V155, F156</b> , P113, L114, <b>E35, A34, K33</b> , T244, E243, N239, I236, I233 | E177, L176, <b>Y23, N152, V155, F156, T158, G159, Q193, Y194, F195, S196, N200</b> , E243, N239, I236, I233 |
| E177                   | L176, <b>Y23, N152, V155, F156</b> , P113, L114, <b>E35, A34, K33</b> , T244, E243, N239, I236, I233       | L176, <b>Y23, N152, V155, F156, T158, G159, Q193, Y194, F195, S196, N200</b> , E243, N239, I236, I233       |
| N152                   | V155, F156, L157, <b>L30, D31, K33</b> , T244, E243, N239, I236, I233                                      | N/A                                                                                                         |
| D153                   | D154, F156, L157, <b>L30, D31, K33</b> , T244, E243, N239, I236, I233                                      | N/A                                                                                                         |
| D154                   | F156, L157, <b>L30, D31, K33</b> , T244, E243, N239, I236, I233                                            | N/A                                                                                                         |
| F174                   | N173, A172, K183, Y129, H127, L126, <b>F37, T36, A34, K33</b> , T244, E243, N239, I236, I233               | A175, L176, <b>Y23, N152, V155, F156, T158, G159, Q193, Y194, F195, S196, N200</b> , E243, N239, I236, I233 |
| L176                   | <b>Y23, N152, V155, F156</b> , P113, L114, <b>E35, A34, K33</b> , T244, E243, N239, I236, I233             | <b>Y23, N152, V155, F156, T158, G159, Q193, Y194, F195, S196, N200</b> , E243, N239, I236, I233             |
| K183                   | Y129, H127, L126, <b>F37, T36, A34, K33</b> , T244, E243, N239, I236, I233                                 | N/A                                                                                                         |
| Subunit B to subunit A |                                                                                                            |                                                                                                             |
| D91                    | V90, V89, D88, A87, D86, R85, A84, N83, E82, <b>Y28, S29, L30, D31, K33, T244, E243, N239, I236, I233</b>  | N/A                                                                                                         |
| D178                   | E177, L176, <b>Y23, L24, I25, E26, C27, Y28, S29, L30, D31, K33</b> , T244, E243, N239, I236, I233         | N/A                                                                                                         |
| E177                   | L176, <b>Y23, L24, I25, E26, C27, Y28, S29, L30, D31, K33</b> , T244, E243, N239, I236, I233               | N/A                                                                                                         |
| N152                   | V155, F156, L157, <b>L30, D31, K33</b> , P247, K248, <b>N245, T244, E243, N239, I236, I233</b>             | N/A                                                                                                         |
| D153                   | D154, F156, L157, <b>L30, D31, K33</b> , P247, K248, <b>N245, T244, E243, N239, I236, I233</b>             | N/A                                                                                                         |
| D154                   | F156, L157, <b>L30, D31, K33</b> , P247, K248, <b>N245, T244, E243, N239, I236, I233</b>                   | N/A                                                                                                         |
| F174                   | A175, L176, <b>Y23, L24, I25, E26, C27, Y28, S29, L30, D31, K33</b> , T244, E243, N239, I236, I233         | N/A                                                                                                         |
| L176                   | <b>Y23, L24, I25, E26, C27, Y28, S29, L30, D31, K33</b> , T244, E243, N239, I236, I233                     | N/A                                                                                                         |
| K183                   | Y129, N80, V81, E82, <b>Y28, S29, L30, D31, K33, T244, E243, N239, I236, I233</b>                          | N/A                                                                                                         |
| Subunit B to subunit C |                                                                                                            |                                                                                                             |
| D91                    | V90, V89, D88, R105, <b>V79, N80, V110, F37, T36, E35, A34, K33, T244, E243,</b>                           | N/A                                                                                                         |

|      |                                                                                                  |                                                                                                                              |
|------|--------------------------------------------------------------------------------------------------|------------------------------------------------------------------------------------------------------------------------------|
|      | N239, I236, I233                                                                                 |                                                                                                                              |
| D178 | E177, L176, Y23, N152, V155, F156, P113, L114, E35, A34, K33, T244, E243, N239, F238, I236, I233 | R179, R133, V132, I131, L130 Y129, H127, T125, Q124, S123, D122, F121, Y194, F195, S196, N200, E243, N239, I236, I233        |
| E177 | L176, Y23, N152, V155, F156, P113, L114, E35, A34, K33, T244, E243, N239, F238, I236, I233       | L176, Y23, N152, V155, F156, T158, G159, Q193, Y194, F195, S196, N200, E243, N239, F238, I236, I233                          |
| N152 | V155, F156, T158, P113, L114, E35, A34, K33, T244, E243, N239, I236, I233                        | V155, F156, T158, G159, Q193, Y194, F195, S196, N200, E243, N239, I236, I233                                                 |
| D153 | D154, F156, T158, P113, L114, E35, A34, K33, T244, E243, N239, I236, I233                        | D154, F156, T158, G159, Q193, Y194, F195, S196, N200, E243, N239, I236, I233                                                 |
| D154 | F156, T158, P113, L114, E35, A34, K33, T244, E243, N239, I236, I233                              | F156, T158, G159, Q193, Y194, F195, S196, N200, E243, N239, I236, I233                                                       |
| F174 | N/A                                                                                              | N173, A172, P171, K170, V168, A167, T166, F165, S164, E163, I162, D161, Q193, Y194, F195, S196, N200, E243, N239, I236, I233 |
| L176 | Y23, N152, V155, F156, P113, L114, E35, A34, K33, T244, E243, N239, F238, I236, I233             | Y23, N152, V155, F156, T158, G159, Q193, Y194, F195, S196, N200, E243, N239, F238, I236, I233                                |
| K183 | N/A                                                                                              | Y129, H127, T125, Q124, S123, D122, F121, Y194, F195, S196, N200, E243, N239, I236, I233                                     |

\*Residues colored black, red, and green belong to subunits B, A, and C, respectively.

\*Residues in the  $\beta$ 1- $\beta$ 2 loop or pre-TM1 are highlighted in bold
