# Supplementary material for: Signal Transduction Pathways in the Pentameric Ligand-Gated Ion Channels
Source: PubMed Central journal article supplement (PMC3648548; doi:10.1371/journal.pone.0064326), 2013-05-08
Supplement: pone.0064326.s002.pdf [file pone.0064326.s002.pdf]

**Table S2. Number of paths identified for each perturbation in three different ending scenarios.** For subunit B to subunit B, each perturbation has a path that includes the  $\beta$ 1- $\beta$ 2 loop, but only 4 of the 9 perturbations produce a path that involves pre-TM1. For subunit B to subunit A, all paths exclusively involve the  $\beta$ 1- $\beta$ 2 loop. For subunit B to subunit C, paths involving the  $\beta$ 1- $\beta$ 2 loop and pre-TM1 are observed with a slight preference for pre-TM1.

|                               | $\beta$ 1- $\beta$ 2 Loop | Pre-TM1    |
|-------------------------------|---------------------------|------------|
| <b>Subunit B to subunit B</b> |                           |            |
| D91                           | 10                        | 0          |
| E177                          | 2                         | 8          |
| D178                          | 2                         | 8          |
| N152                          | 10                        | 0          |
| D153                          | 10                        | 0          |
| D154                          | 10                        | 0          |
| F174                          | 8                         | 2          |
| L176                          | 2                         | 8          |
| K183                          | 10                        | 0          |
|                               | 71%                       | 29%        |
| <b>Subunit B to subunit A</b> |                           |            |
| D91                           | 10                        | 0          |
| E177                          | 10                        | 0          |
| D178                          | 10                        | 0          |
| N152                          | 10                        | 0          |
| D153                          | 10                        | 0          |
| D154                          | 10                        | 0          |
| F174                          | 10                        | 0          |
| L176                          | 10                        | 0          |
| K183                          | 10                        | 0          |
|                               | 100%                      | 0%         |
| <b>Subunit B to subunit C</b> |                           |            |
| D91                           | 10                        | 0          |
| E177                          | 2                         | 8          |
| D178                          | 1                         | 9          |
| N152                          | 3                         | 7          |
| D153                          | 3                         | 7          |
| D154                          | 3                         | 7          |
| F174                          | 0                         | 10         |
| L176                          | 2                         | 8          |
| K183                          | 0                         | 10         |
|                               | 27%                       | 73%        |
| <b>Overall</b>                | <b>66%</b>                | <b>34%</b> |
